# Supplementary material for: The genome of the Tiger Milk mushroom, Lignosus rhinocerotis, provides insights into the genetic basis of its medicinal properties
Source: PubMed Central journal article supplement (PMC4129116; doi:10.1186/1471-2164-15-635), 2014-07-29
Supplement: 12864_2014_6333_MOESM1_ESM.pdf [file 12864_2014_6333_MOESM1_ESM.pdf]

## Heterogeneous sequence (k-mer) analysis

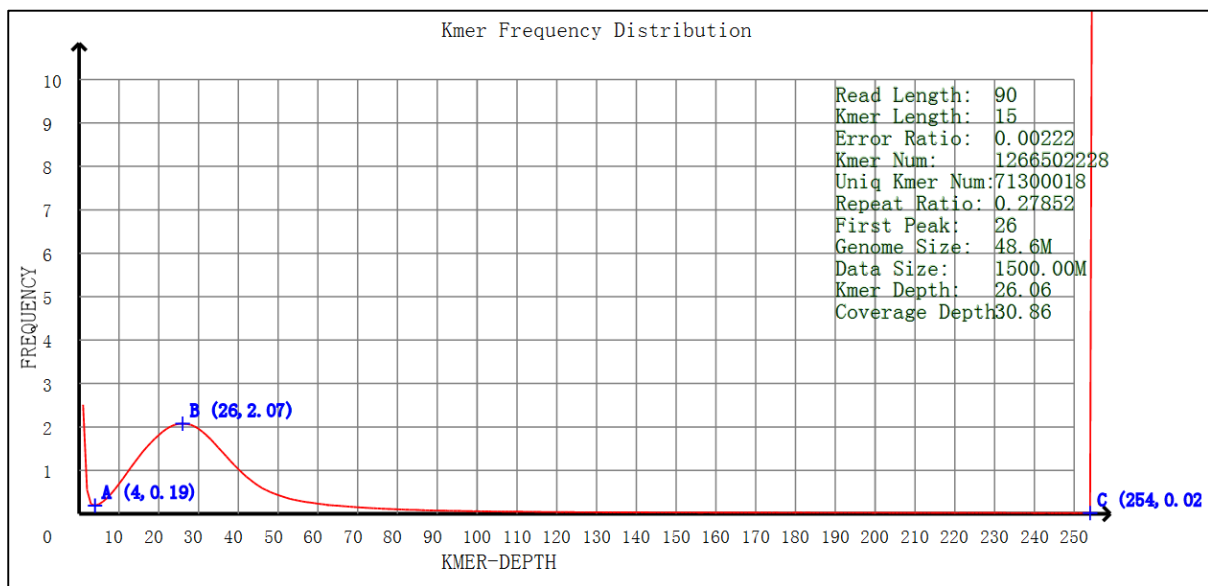

**Figure 1 K-mer (15-mer) analysis of *L. rhinocerotis* genome.** The genome size of *L. rhinocerotis* is estimated to be 48.6 Mb based on the 15-mer analysis (Liu et al., 2013). The absence of additional peak at  $\frac{1}{2}$  of the k-mer depth of the main peak (k-mer depth = 26) suggests that the genome sequences do not exhibit high level of heterozygosity [16]. The k-mer distribution should follow the Poisson distribution but low-depth k-mer take up slightly higher proportion in this case. This is most likely due to sequencing error but not heterozygosity. Reads with low sequence quality, significant poly-A structure and kmer frequency of 1 were subsequently removed prior to assembly.

Additional reference:

Liu B, Shi Y, Yuan J, Hu X, Zhang H, Li N, Li Z, Chen Y, Mu D, Fan W: **Estimation of genomic characteristics by analyzing k-mer frequency in *de novo* genome projects.** 2013, arXiv:1308.2012.

## Repeat rate analysis

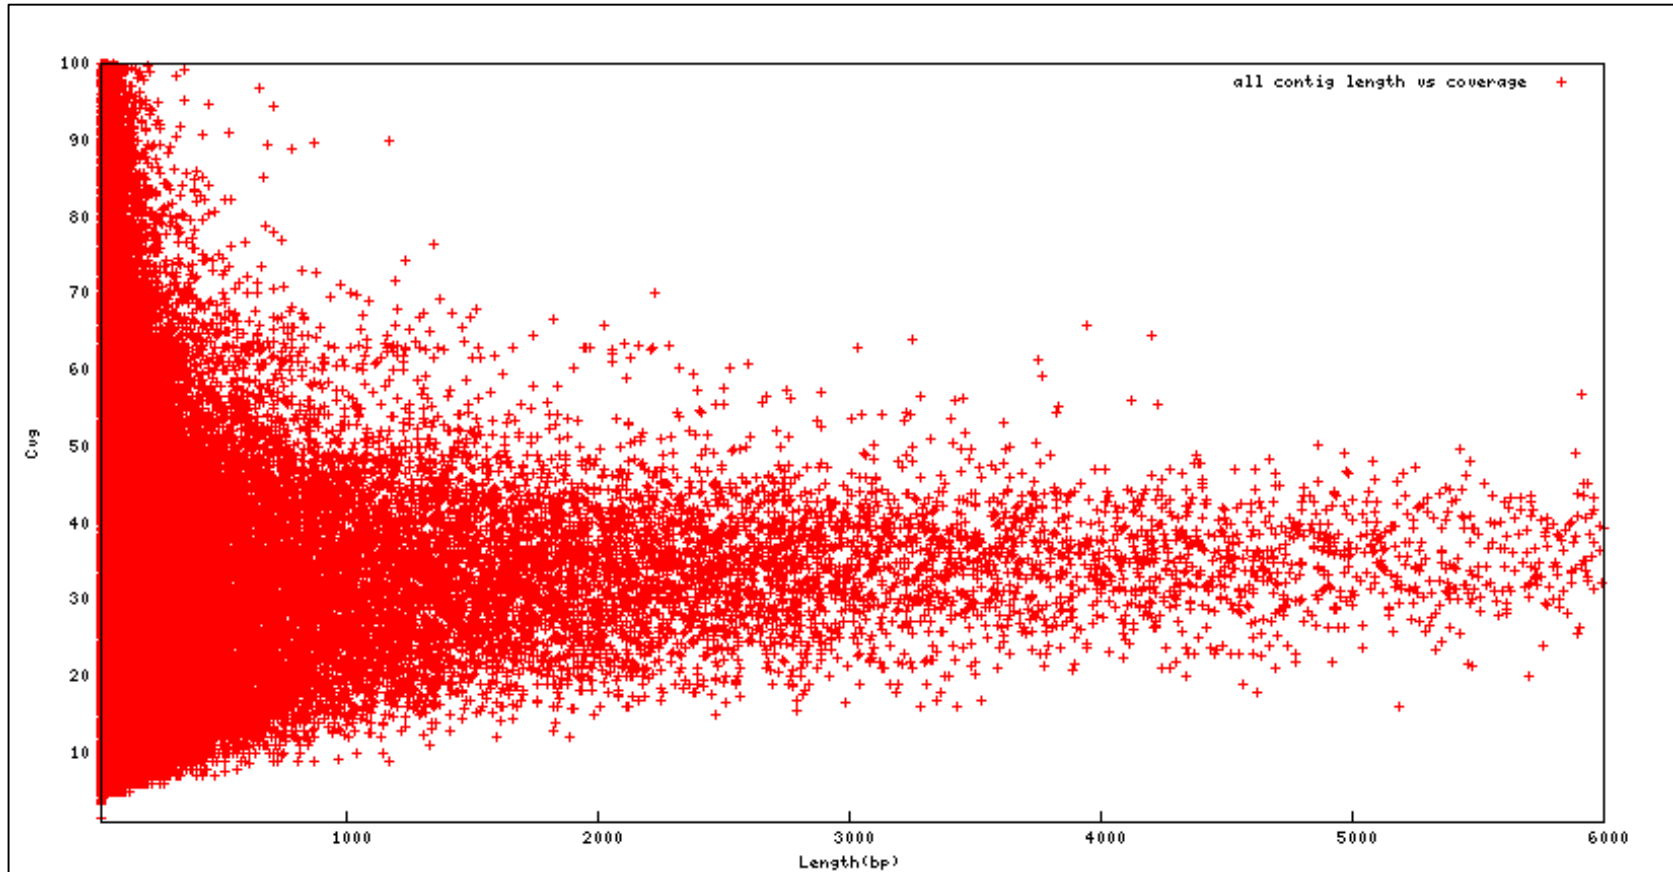

**Figure 2 Contig length and coverage distribution.** Based on the contig length and depth analysis, contigs with a certain length are selected to calculate their average coverage as the average coverage of the genome.

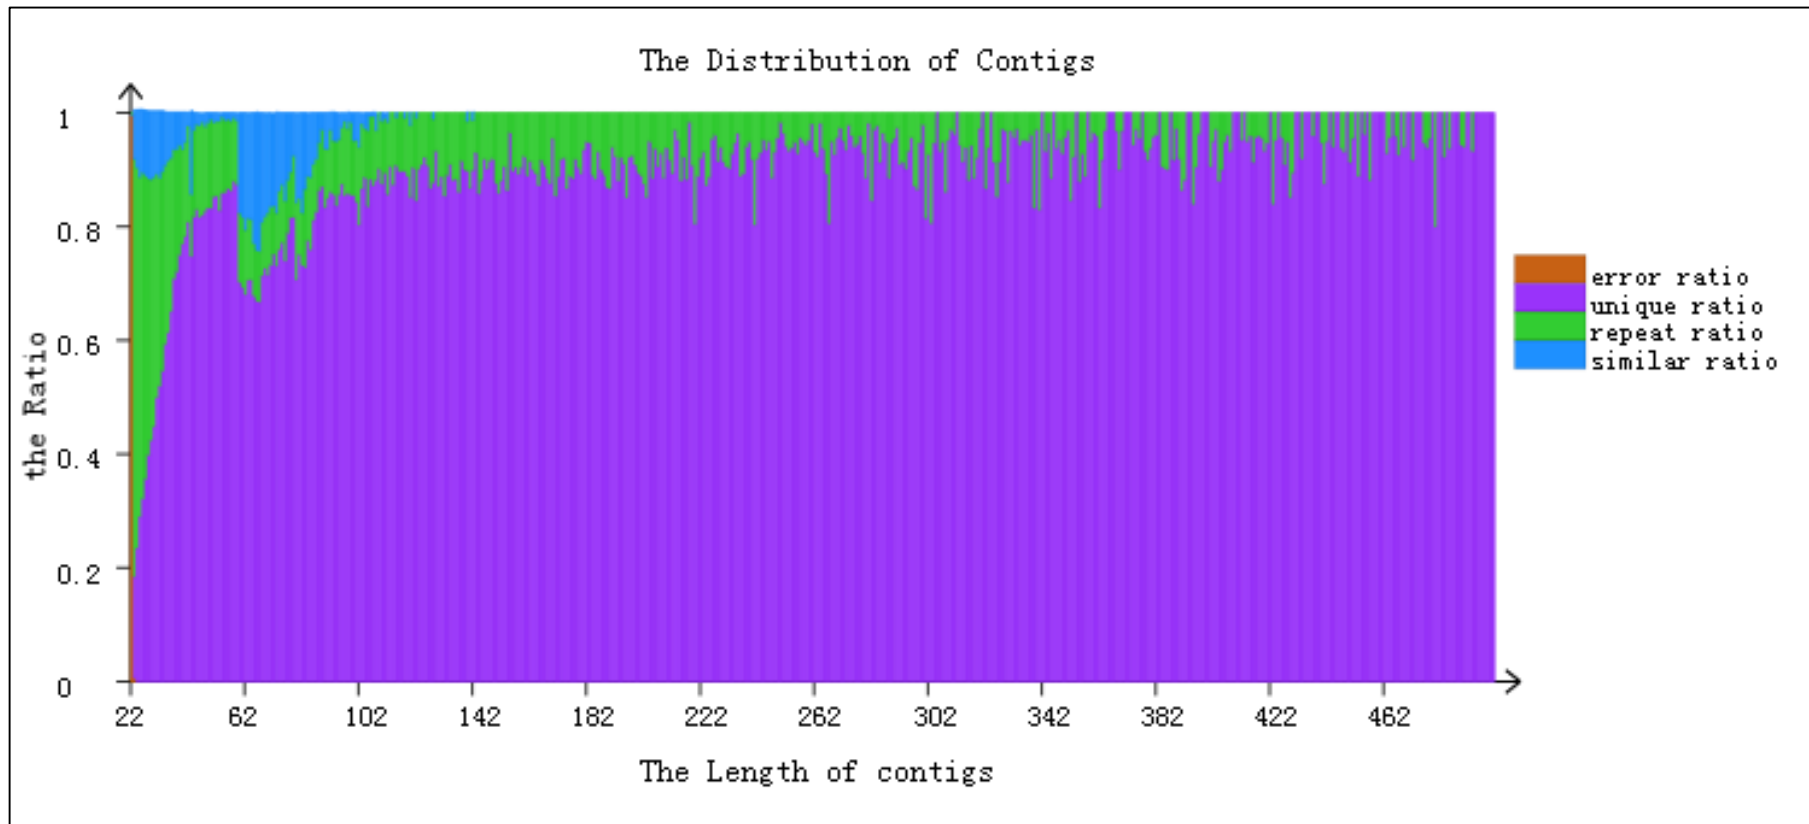

**Figure 3 Contig classification graph.** The contig classification analysis for different length of contigs contains unique ratio, repeat ratio, similar ratio, and error ratio where error is the average coverage with less than 0.1-fold coverage; repeat is the average coverage with more than 1.8-fold coverage; similar is defined as the similarity higher than 0.95 between contigs of the same length with the average coverage between 0.1-fold and 1.8-fold; and others are unique. The ratio was calculated as shown in Table 1.

**Table 1 Repeat rate statistics**

|                     | <b>Number of contig</b> | <b>Length (bp)</b> | <b>Number of repeat</b> | <b>Repeat length (bp)</b> | <b>Ratio (%)</b> | <b>Length ratio (%)</b> |
|---------------------|-------------------------|--------------------|-------------------------|---------------------------|------------------|-------------------------|
| <b>Total contig</b> | 840,965                 | 56,184,612         | 222,416                 | 7,191,525                 | 26.44            | 12.79                   |
| <b>Short contig</b> | 805,336                 | 25,402,651         | 219,603                 | 6,473,589                 | 27.26            | 25.48                   |
| <b>Long contig</b>  | 35,629                  | 30,781,961         | 2,813                   | 717,936                   | 7.89             | 2.33                    |

Short contig is contig with the length less than 100 bp and the others are long contig; repeat contig includes the short contig with average coverage no less than 1.5-fold and long contig with average coverage no less than 1.8-fold. The repeat rate of contig with length shorter than 100 bp and longer than 100 bp is 27.26 % and 7.89 %, respectively. Repeat rate of the whole genome is 26.44 %. The total length of repeat fragment is 7,191,525 bp.
